# Supplementary material for: Role of Infodemics on Social Media in the Development of People’s Readiness to Follow COVID-19 Preventive Measures
Source: MDPI journal article supplement (doi:10.3390/ijerph19031347), 2022-01-25
Supplement: s1 [file s1]

**Table S1.** Constructs and items.

| Constructs                                    | Code  | Items                                                                                                             | Source                                     |
|-----------------------------------------------|-------|-------------------------------------------------------------------------------------------------------------------|--------------------------------------------|
| Attitude                                      | ATT1  | Following COVID-19 preventive measures is a good idea                                                             | Dutta et al. [43]; Hwang et al. [44]       |
|                                               | ATT2  | Following COVID-19 preventive measures is pleasant.                                                               |                                            |
|                                               | ATT3  | Following COVID-19 preventive measures is beneficial                                                              |                                            |
| Trust in the Government                       | TRGT1 | I believe the government                                                                                          | Enria et al. [33]; Kapoor et al. [34]      |
|                                               | TRGT2 | I consider the government is trustworthy regarding COVID-19 preventive measures                                   |                                            |
|                                               | TRGT3 | I sense most things the government does regarding COVID-19 prevention are correct                                 |                                            |
| Trust in Social media                         | TRSM1 | I believe the news circulated on social media regarding the preventive measurements of COVID-19                   | Enria et al. [33]; Kapoor et al. [34]      |
|                                               | TRSM2 | I feel most of the information circulated on social media regarding COVID-19 prevention are correct               |                                            |
|                                               | TRSM3 | In total, social media is trustworthy regarding the news of COVID-19                                              |                                            |
| Perceived benefit                             | PBT1  | COVID-19 preventive measures are convenient to follow                                                             | Gong et al. [47]; Hong et al. [49]         |
|                                               | PBT2  | Following COVID-19 preventive measures can improve my health                                                      |                                            |
|                                               | PBT3  | Following COVID-19 preventive measures can improve my productivity in terms of improving my health                |                                            |
| Personal innovativeness                       | PIIT1 | If I heard about a new regulation, COVID-19 preventive measures, I look for ways to follow                        | Sun et al. [11]; Alkawsi et al. [12]       |
|                                               | PIIT2 | I like to experiment to follow COVID-19 preventive measures                                                       |                                            |
|                                               | PIIT3 | Generally, I would not be hesitant to follow COVID-19 preventive measures                                         |                                            |
| Peer referent                                 | PRT1  | People I know think I should follow COVID-19 preventive measures.                                                 | Potarca [9]; Sakallaris et al. [52]        |
|                                               | PRT2  | Social media believe that the public should follow COVID-19 preventive measures.                                  |                                            |
|                                               | PRT3  | Insofar as I know, everyone around me is following COVID-19 preventive measures.                                  |                                            |
| Health infodemic                              | HID1  | I am influenced by interpretations, videos, and comments made on social media about COVID-19 preventive measures. | Kim et al. [18]; Cinelli and Galeazzi [19] |
|                                               | HID2  | I believe whatsoever is accessible on social media is true about COVID-19 preventive measures.                    |                                            |
|                                               | HID3  | Social media misguides people about health entities regarding COVID-19 preventive measures.                       |                                            |
|                                               | HID4  | I believe most of the content presented on social media is false about COVID-19 preventive measures.              |                                            |
|                                               | HID5  | Social media shape my personal opinions about COVID-19 preventive measures.                                       |                                            |
| Readiness toward COVID-19 preventive measures | INT1  | I intend to follow COVID-19 preventive measures                                                                   | Dutta et al. [43]; Hwang et al. [44]       |
|                                               | INT2  | My readiness toward COVID-19 preventive measures is positive.                                                     |                                            |
|                                               | INT3  | The probability that I follow COVID-19 preventive measures daily is very high                                     |                                            |
|                                               | INT4  | Whatsoever the situations, I do not intend to toward COVID-19 preventive measures                                 |                                            |
